# Supplementary material for: Similar color analysis based on deep learning (SCAD) for multiplex digital PCR via a single fluorescent channel
Source: Royal Society of Chemistry journal article supplement (doi:10.1039/d2lc00637e), 2022-01-01
Supplement: d2lc00637e1.pdf [file d2lc00637e1.pdf]

## **Similar Colors Analysis based on Deep Learning (SCAD) for Multiplex Digital PCR *via* Single Fluorescent Channel**

Chaoyu Cao<sup>1,2</sup>, Minli You<sup>1,2\*</sup>, Haoyang Tong<sup>1,2</sup>, Zhenrui Xue<sup>2,3</sup>, Chang Liu<sup>1,2</sup>, Wanghong He<sup>2,4</sup>, Ping Peng<sup>2,3</sup>, Chunyan Yao<sup>3</sup>, Ang Li<sup>4</sup>, Xiayu Xu<sup>1,2</sup>, Feng Xu<sup>1,2\*</sup>

<sup>1</sup> *The Key Laboratory of Biomedical Information Engineering of Ministry of Education, School of Life Science and Technology, Xi'an Jiaotong University, Xi'an 710049, P.R. China*

<sup>2</sup> *Bioinspired Engineering and Biomechanics Center (BEBC), Xi'an Jiaotong University, Xi'an 710049, P.R. China*

<sup>3</sup> *Department of Transfusion Medicine, Southwest Hospital, Third Military Medical University (Army Medical University), Chongqing 400038, P.R. China*

<sup>4</sup> *Key Laboratory of Shaanxi Province for Craniofacial Precision Medicine Research, College of Stomatology, Xi'an Jiaotong University, Xi'an 710049, P.R. China*

*\* Corresponding authors: [youminli@xjtu.edu.cn](mailto:youminli@xjtu.edu.cn); [fengxu@mail.xjtu.edu.cn](mailto:fengxu@mail.xjtu.edu.cn)*

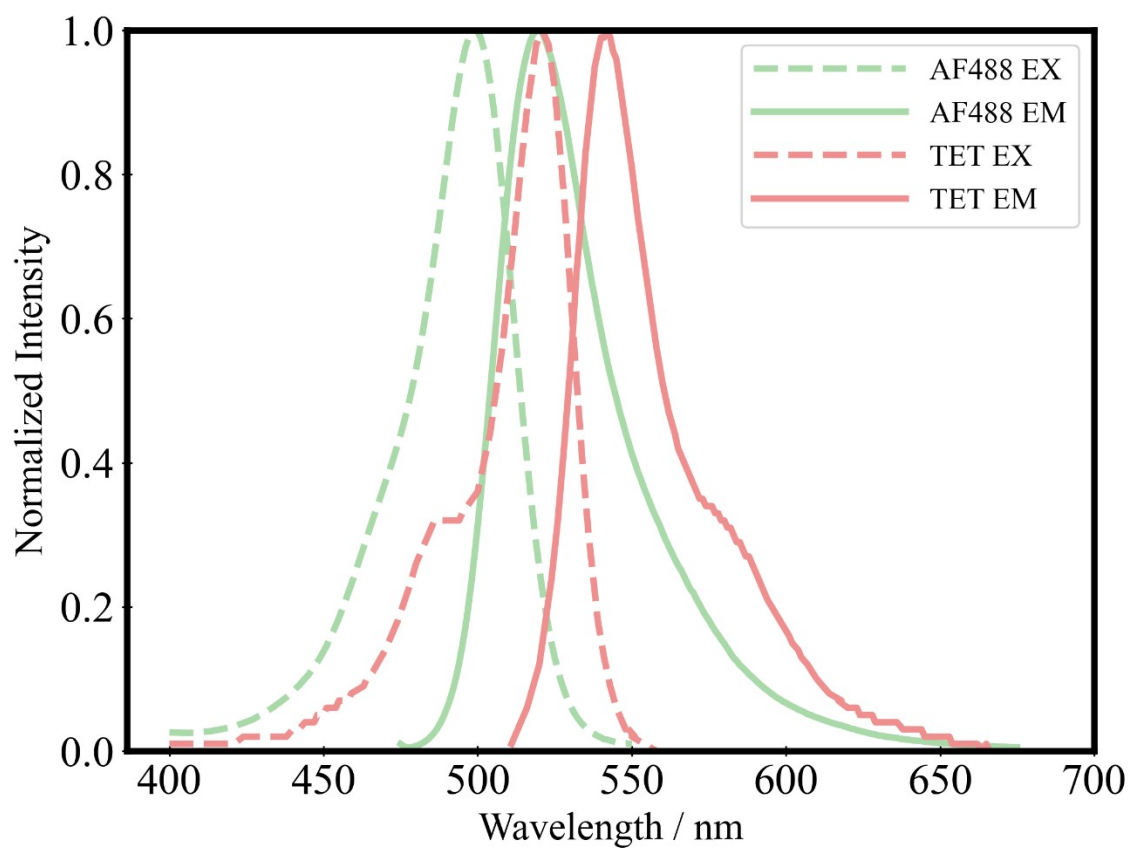

**Figure S1. Excitation (EX) and emission (EM) spectrums of AF488 and TET.**

**Table S1. dPCR reaction system design**

|                          |                  |                                                                                           |
|--------------------------|------------------|-------------------------------------------------------------------------------------------|
| <i>bla<sub>NDM</sub></i> | <b>Gene (85)</b> | CACACCAGTGACAATATCACCGTTGGGATCGACGGCACCGAC<br>ATCGCTTTTGGTGGCTGCCTGATCAAGGACAGCAAGGCCAAGT |
|                          | <b>NDM-F</b>     | CACACCAGTGACAATATCACCGTTG                                                                 |
|                          | <b>NDM-R</b>     | ACTTGGCCTTGCTGTCCTTGAT                                                                    |
|                          | <b>Probe</b>     | TCGACGGCACCGACATCGCTT                                                                     |

|                          |              |                                                                                                                                                                                                                                                                                             |
|--------------------------|--------------|---------------------------------------------------------------------------------------------------------------------------------------------------------------------------------------------------------------------------------------------------------------------------------------------|
| <i>bla<sub>VIM</sub></i> | <b>Gene</b>  | CTTCGGTCCAGTAGAACTCTTCTATCCTGGTGCTGCGCATTCG<br>ACCGACAACCTTAGTTGTGTACGTCCCGTCTGCGAGTGTGCTCT<br>ATGGTGGTTGTGCGATTTATGAGTTGTCACGCACGTCTGCGGG<br>GAACGTGGCCGATGCCGATCTGGCTGAATGGCCCACCTCCATT<br>GAGCGGATTCAACAACACTACCCGGAAGCACAGTTCGTCATTC<br>CGGGGCACGGCCTGCCGGGCGGTCTAGACTTGCTCAAGCACA<br>C |
|                          | <b>VIM-F</b> | CTTCGGTCCAGTAGAACTCT                                                                                                                                                                                                                                                                        |
|                          | <b>VIM-R</b> | GTGTGCTTGAGCAAGTCT                                                                                                                                                                                                                                                                          |
|                          | <b>Probe</b> | ATGCCGATCTGGCTGAATGGCCCAC                                                                                                                                                                                                                                                                   |
|                          |              |                                                                                                                                                                                                                                                                                             |

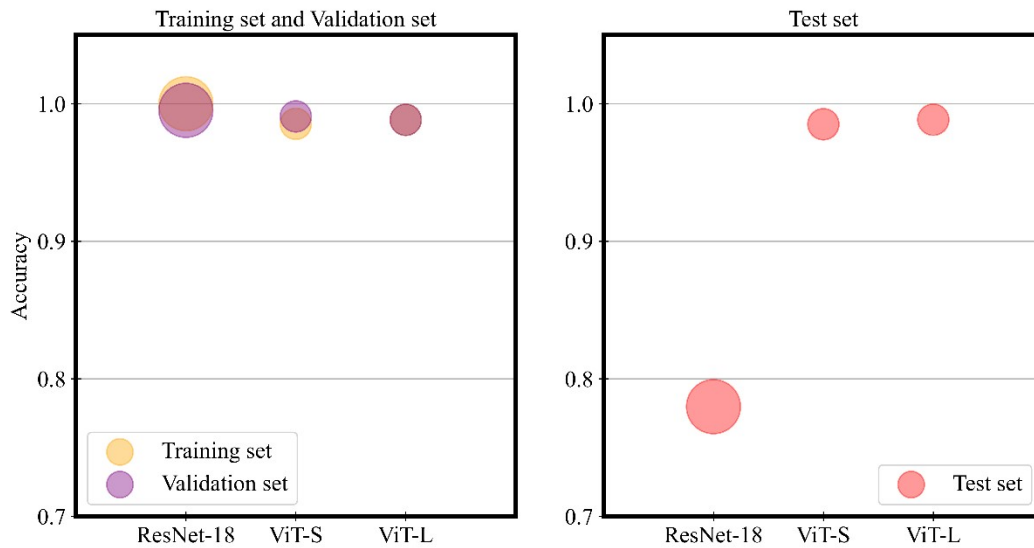

**Figure S2. Performance comparison of ResNet-18 and ViT.** Performances of ResNet-18, ViT model on small dataset (ViT-S) (7000 images in training set and 3000 images in test set) and ViT model on larger dataset (ViT-L) (70000 images in training set and 30000 images in test set) are compared. Radius of the scatters indicates MACs (1.49G for ResNet-18 and 0.86G for ViT).

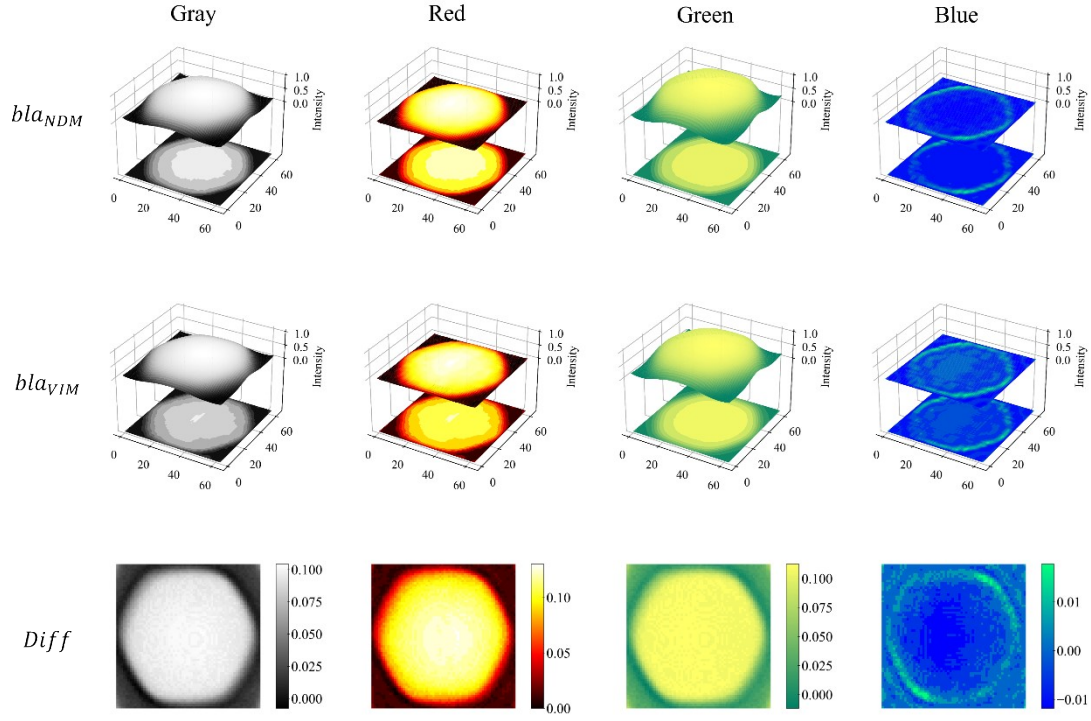

**Figure S3.** The intensities spatial distribution of gray and RGB values within  $bla_{NDM}$  and  $bla_{VIM}$  microwells (the first and the second rows) and their difference (the third row). Gray intensities in the figure were normalized by the maximum value in the gray intensities of  $bla_{NDM}$  and  $bla_{VIM}$  merged images. RGB values are normalized by the maximum value in all three channels for  $bla_{NDM}$  and  $bla_{VIM}$  merged images.

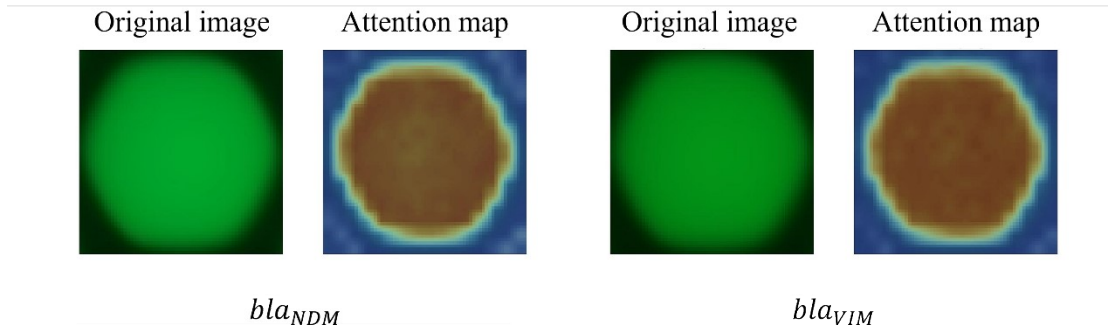

**Figure S4.** Attention map for the last layer of ViT.

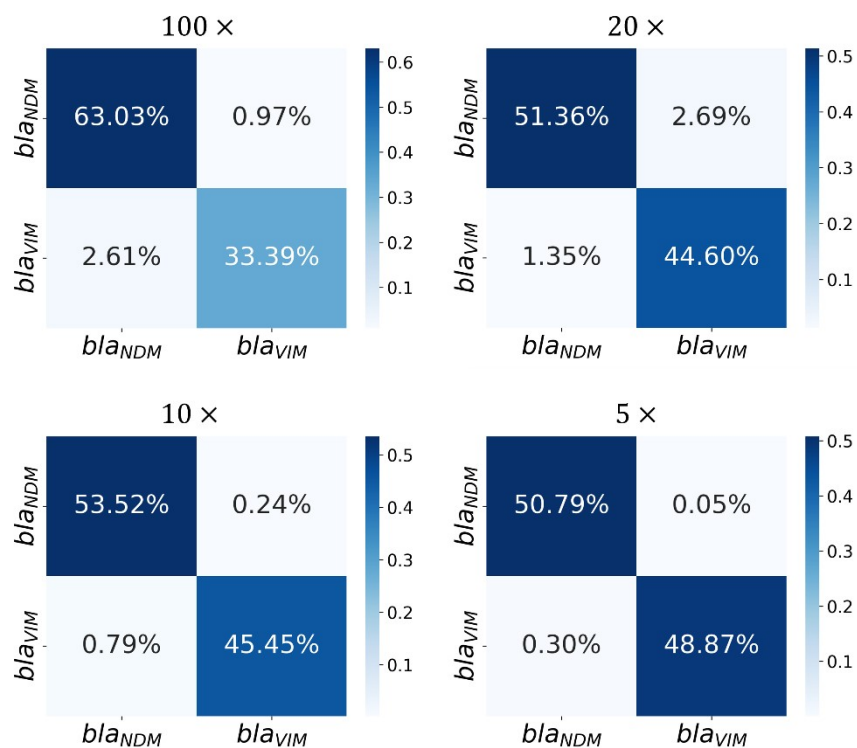

**Figure S5. Confusion matrix for test set on different concentration.**

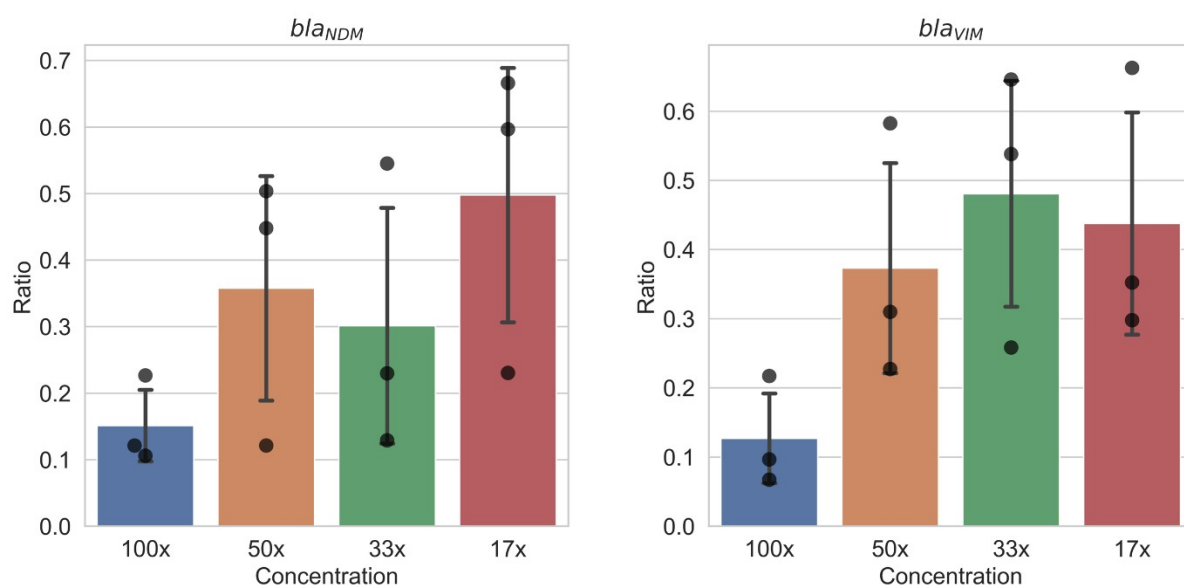

**Figure S6. Quantification results for *bla<sub>NDM</sub>* and *bla<sub>VIM</sub>* dual target samples by intensity-based method (Gaussian multi-peak fitting on intensity distribution histogram). Both gene have unstable performance on quantification.**
